# Supplementary material for: Mechanisms underlying sharpening of visual response dynamics with familiarity
Source: eLife journal article supplement (doi:10.7554/elife.44098), 2019-08-08
Supplement: supp [file elife_poa_e44098_Figure_3_figure_supplement_1.pdf › elife_poa_e44098_Figure_3_figure_supplement_1.pdf]

## Figure 3 - figure supplement 1

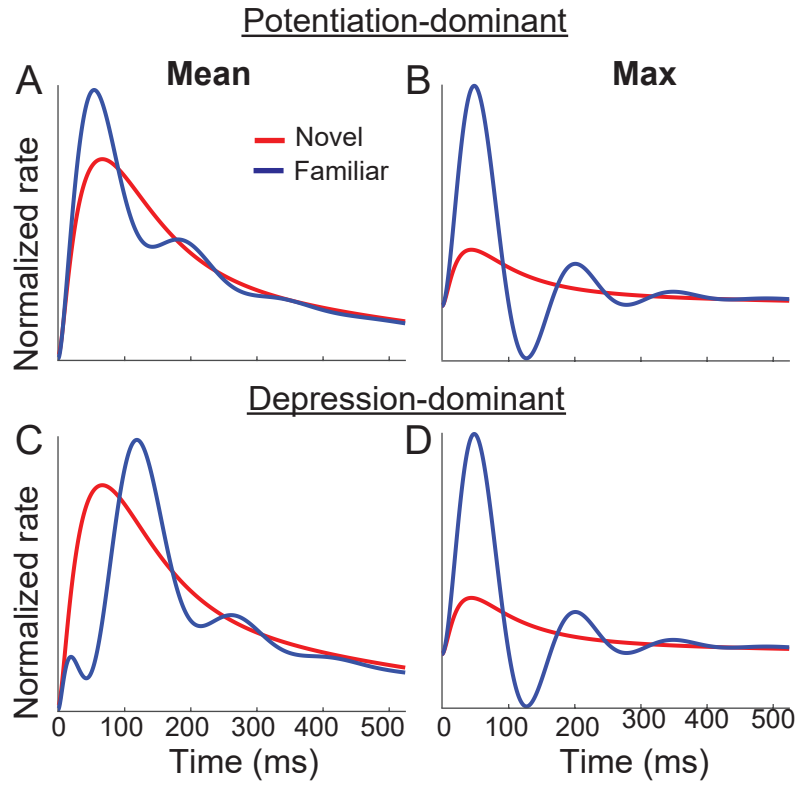

**Figure 3 – figure supplement 1.** Networks with synaptic plasticity only in recurrent connections with slow negative feedback. Average (A,C) and maximal (B,D) response before (red) and after (red) learning with potentiation-dominant (A,B) or depression-dominant (C,D) synaptic plasticity rules. The simulation of the mean-field dynamics is the same as in Fig. 5 with the same parameters except  $\bar{f}_F = 0$ ,  $\bar{f}_R = 0.1$  (A,B), and  $\bar{f}_R = -0.2$  (C,D).
