# Supplementary material for: Mechanisms underlying sharpening of visual response dynamics with familiarity
Source: eLife journal article supplement (doi:10.7554/elife.44098), 2019-08-08
Supplement: supp [file elife_poa_e44098_Figure_5_figure_supplement_1.pdf › elife_poa_e44098_Figure_5_figure_supplement_1.pdf]

## Figure 5 - figure supplement 1

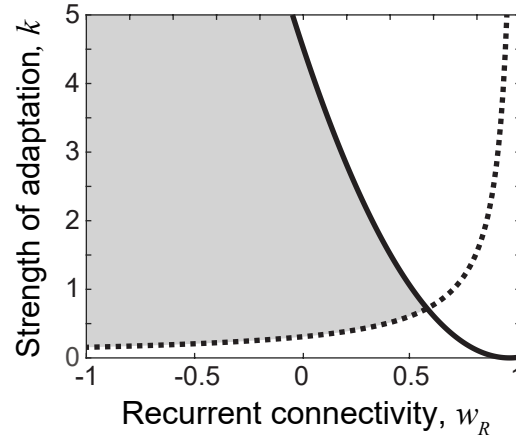

**Figure 5 – figure supplement 1.** Constraints on  $w_R$  and  $k$  to reproduce responses to novel stimuli (shaded area). In the dynamics of  $\bar{r}$  and  $\bar{a}$  in Eq. (4), no damped oscillation for novel stimuli provides a constraint  $k \leq ((-1 + w_R) / \tau_R + 1 / \tau_A)^2 \tau_R \tau_A / 4$  (solid black line). To analytically obtain the constraints for the lower peak in the successive presentation of novel stimuli, we assumed that during the rising phase of activity, adaptation variable and external inputs are constant. Also, we assumed neural activity changes linearly during the rising and decaying phase. Under these assumptions, the lower peak for the second novel stimuli provides the constraint  $c(\tau_R, \tau_A, t_0, t_l, r_l / r_0) < (1 - w_R)k$  (the dotted line). Here,  $c$  is a constant determined by time constants  $\tau$ 's and  $t_0$  and  $t_l$  that are the durations of the rising and decaying phases, and  $r_0$  and  $r_l$  that are the activities at the end of the rising and decaying phases such that

$$c = \frac{r_l / r_0 \cdot \tau_R / t_0}{1 - \exp(-t_l / \tau_A) - (1 - r_l / r_0)(\tau_A / t_0 (\exp(-t_l / \tau_A) - 1) + 1)} .$$

The parameters used in this figure are  $\tau_R = 5$  ms,  $\tau_A = 200$  ms,  $t_0 = 30$  ms,  $t_l = 120$  ms,  $r_l / r_0 = 0.7$ .
