# Supplementary material for: Mechanisms underlying sharpening of visual response dynamics with familiarity
Source: eLife journal article supplement (doi:10.7554/elife.44098), 2019-08-08
Supplement: supp [file elife_poa_e44098_Figure_5_figure_supplement_3.pdf › elife_poa_e44098_Figure_5_figure_supplement_3.pdf]

## Figure 5 - figure supplement 3

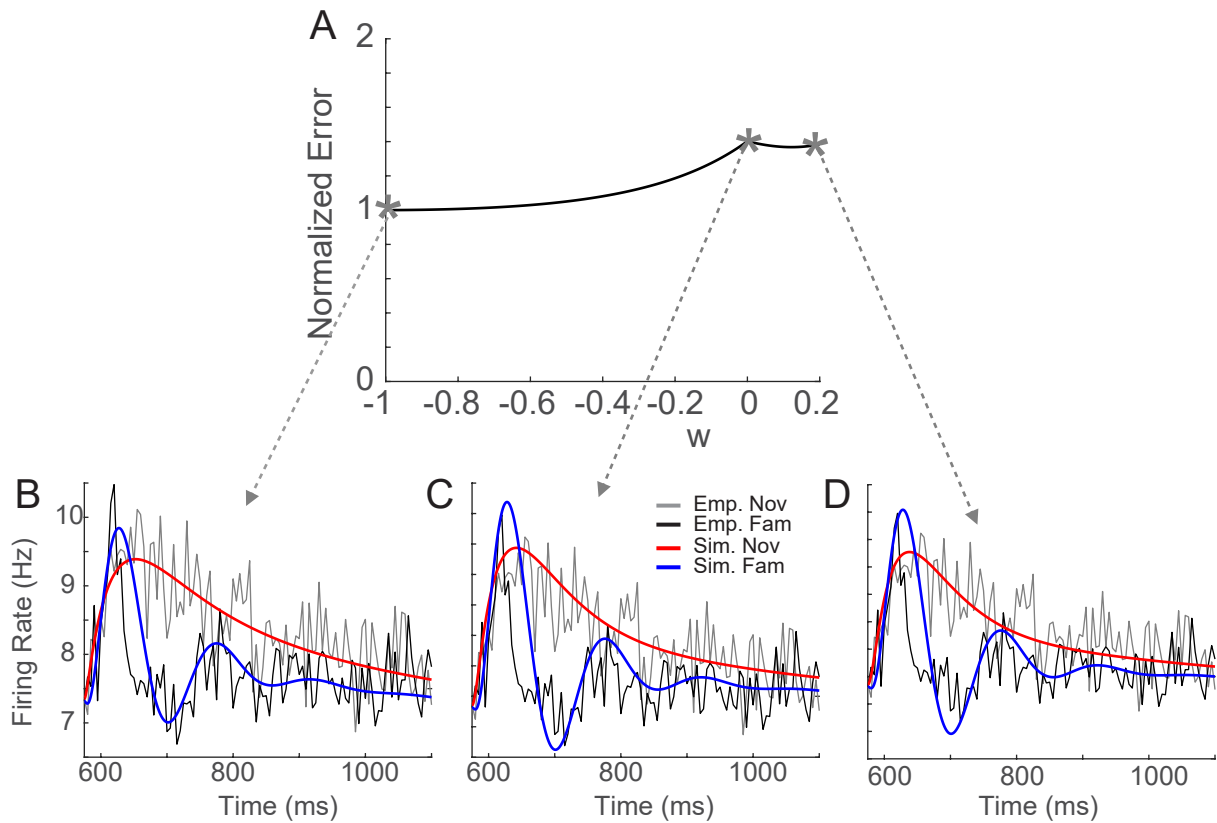

**Figure 5 – figure supplement 3.** Sensitivity of fitting to changes in the recurrent connectivity strength before learning,  $w_R$ . (A) The distance between the data and simulation of the response for familiar stimuli normalized by the lowest distance as in Figure 5-figure supplement 2. (B-D) Comparison between the data and network simulations for different  $w_R$ . For a wide range of  $w_R$ , the simulation fit the data well. The parameters are the same as in those in Fig. 5 except  $a$ ,  $b$ ,  $t_0$ , and  $t_I$  which were adjusted for each  $w_R$  to reproduce response to novel stimuli.
