# Supplementary material for: Mechanisms underlying sharpening of visual response dynamics with familiarity
Source: eLife journal article supplement (doi:10.7554/elife.44098), 2019-08-08
Supplement: supp [file elife_poa_e44098_Figure_6_figure_supplement_2.pdf › elife_poa_e44098_Figure_6_figure_supplement_2.pdf]

## Figure 6 - figure supplement 2

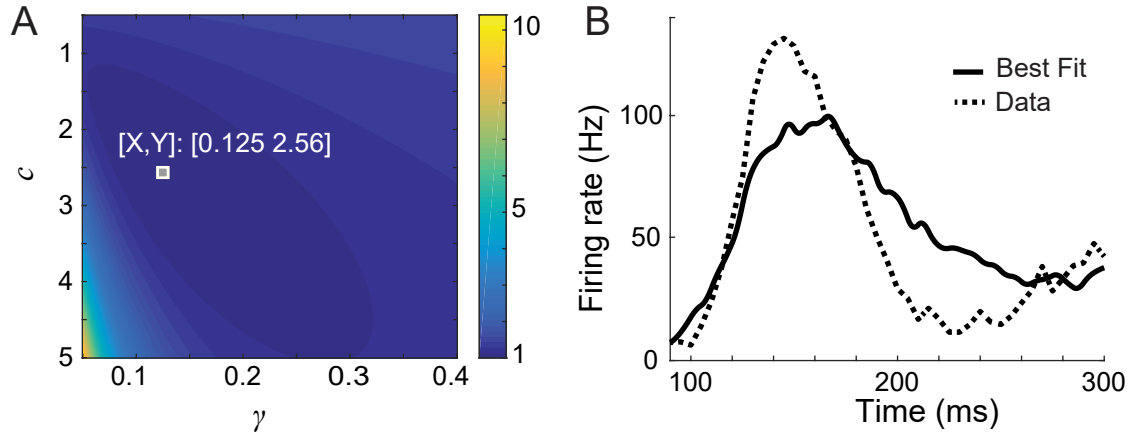

**Figure 6 – figure supplement 2.** Short-term depression cannot reproduce a damped oscillation after learning. (A) Parameter search of the strength of depression ( $\gamma$ ) and strength of potentiation ( $c = f_m^R g_m^R$ ). The color map shows the distance between the data and simulation of the response for familiar stimuli normalized by the lowest distance. (B) Time course of the response to the best familiar stimuli with the best-fitted parameters  $\gamma = 0.125$ , and  $f_m^R g_m^R = 2.56$ . Other parameters are  $\tau_R = 5$  ms,  $\tau_x = 200$  ms, and  $I_m^X$  is obtained from the response to the best novel stimuli.
