# Supplementary material for: Mechanisms underlying sharpening of visual response dynamics with familiarity
Source: eLife journal article supplement (doi:10.7554/elife.44098), 2019-08-08
Supplement: supp [file elife_poa_e44098_Figure_6_figure_supplement_3.pdf › elife_poa_e44098_Figure_6_figure_supplement_3.pdf]

## Figure 6 - figure supplement 3

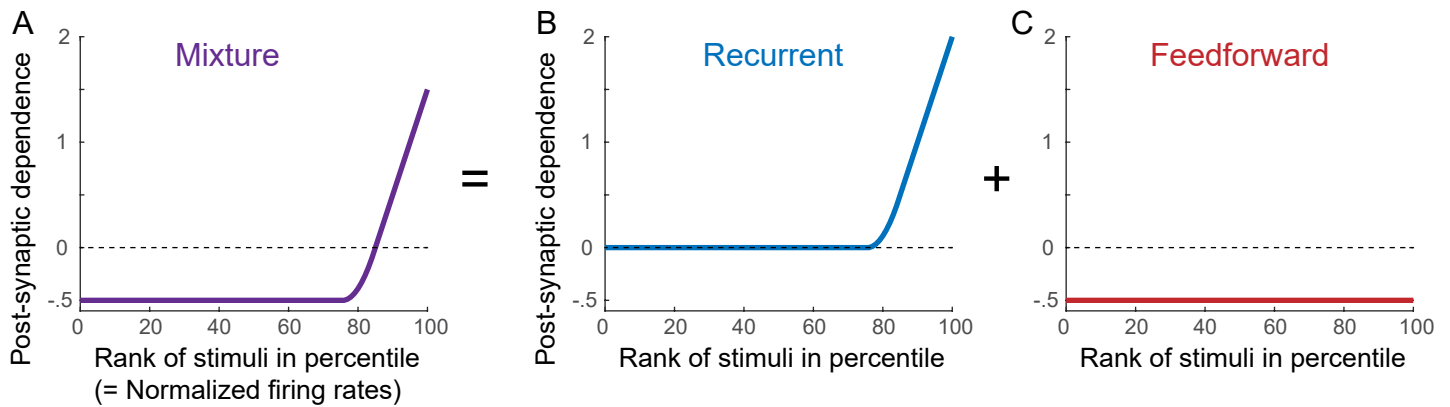

**Figure 6 – figure supplement 3.** Schematics of synaptic plasticity rules in different connections. The learning rule inferred from time-averaged activities (A) can be considered to be a combination of recurrent (B) and feedforward (C) synaptic plasticity. Such a learning rule shows a similar dependence on the normalized rates (equivalently the rank of stimuli) across different neurons (A; Lim et al., 2015). Inspired by this, we assumed the same synaptic plasticity rules of recurrent and feedforward connections across different neurons for normalized firing rates (B,C).
